# Supplementary material
Source: PubMed Central journal article supplement (PMC2690391)

Figure 3. Panel A shows p values of the association of SNPs at 2q24.3 with the overall survival; red points represent  $p < 0.01$  whereas blue points represent  $p \geq 0.01$ . Panel B shows the linkage disequilibrium structure of STK39 locating at 2q24.3. Boxes are shaded according to the standardized disequilibrium coefficient and the numbers in the boxes represents the disequilibrium coefficient,  $D'$  where the empty boxes mean the  $D' = 1$ .

Panel 3A

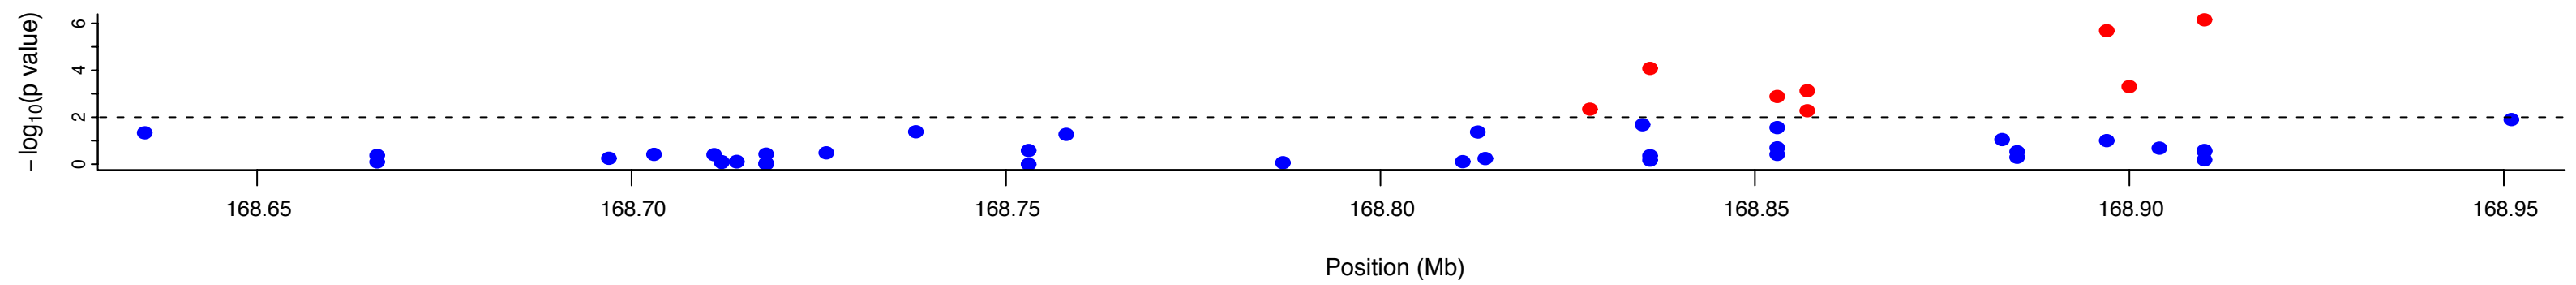

Panel 3B

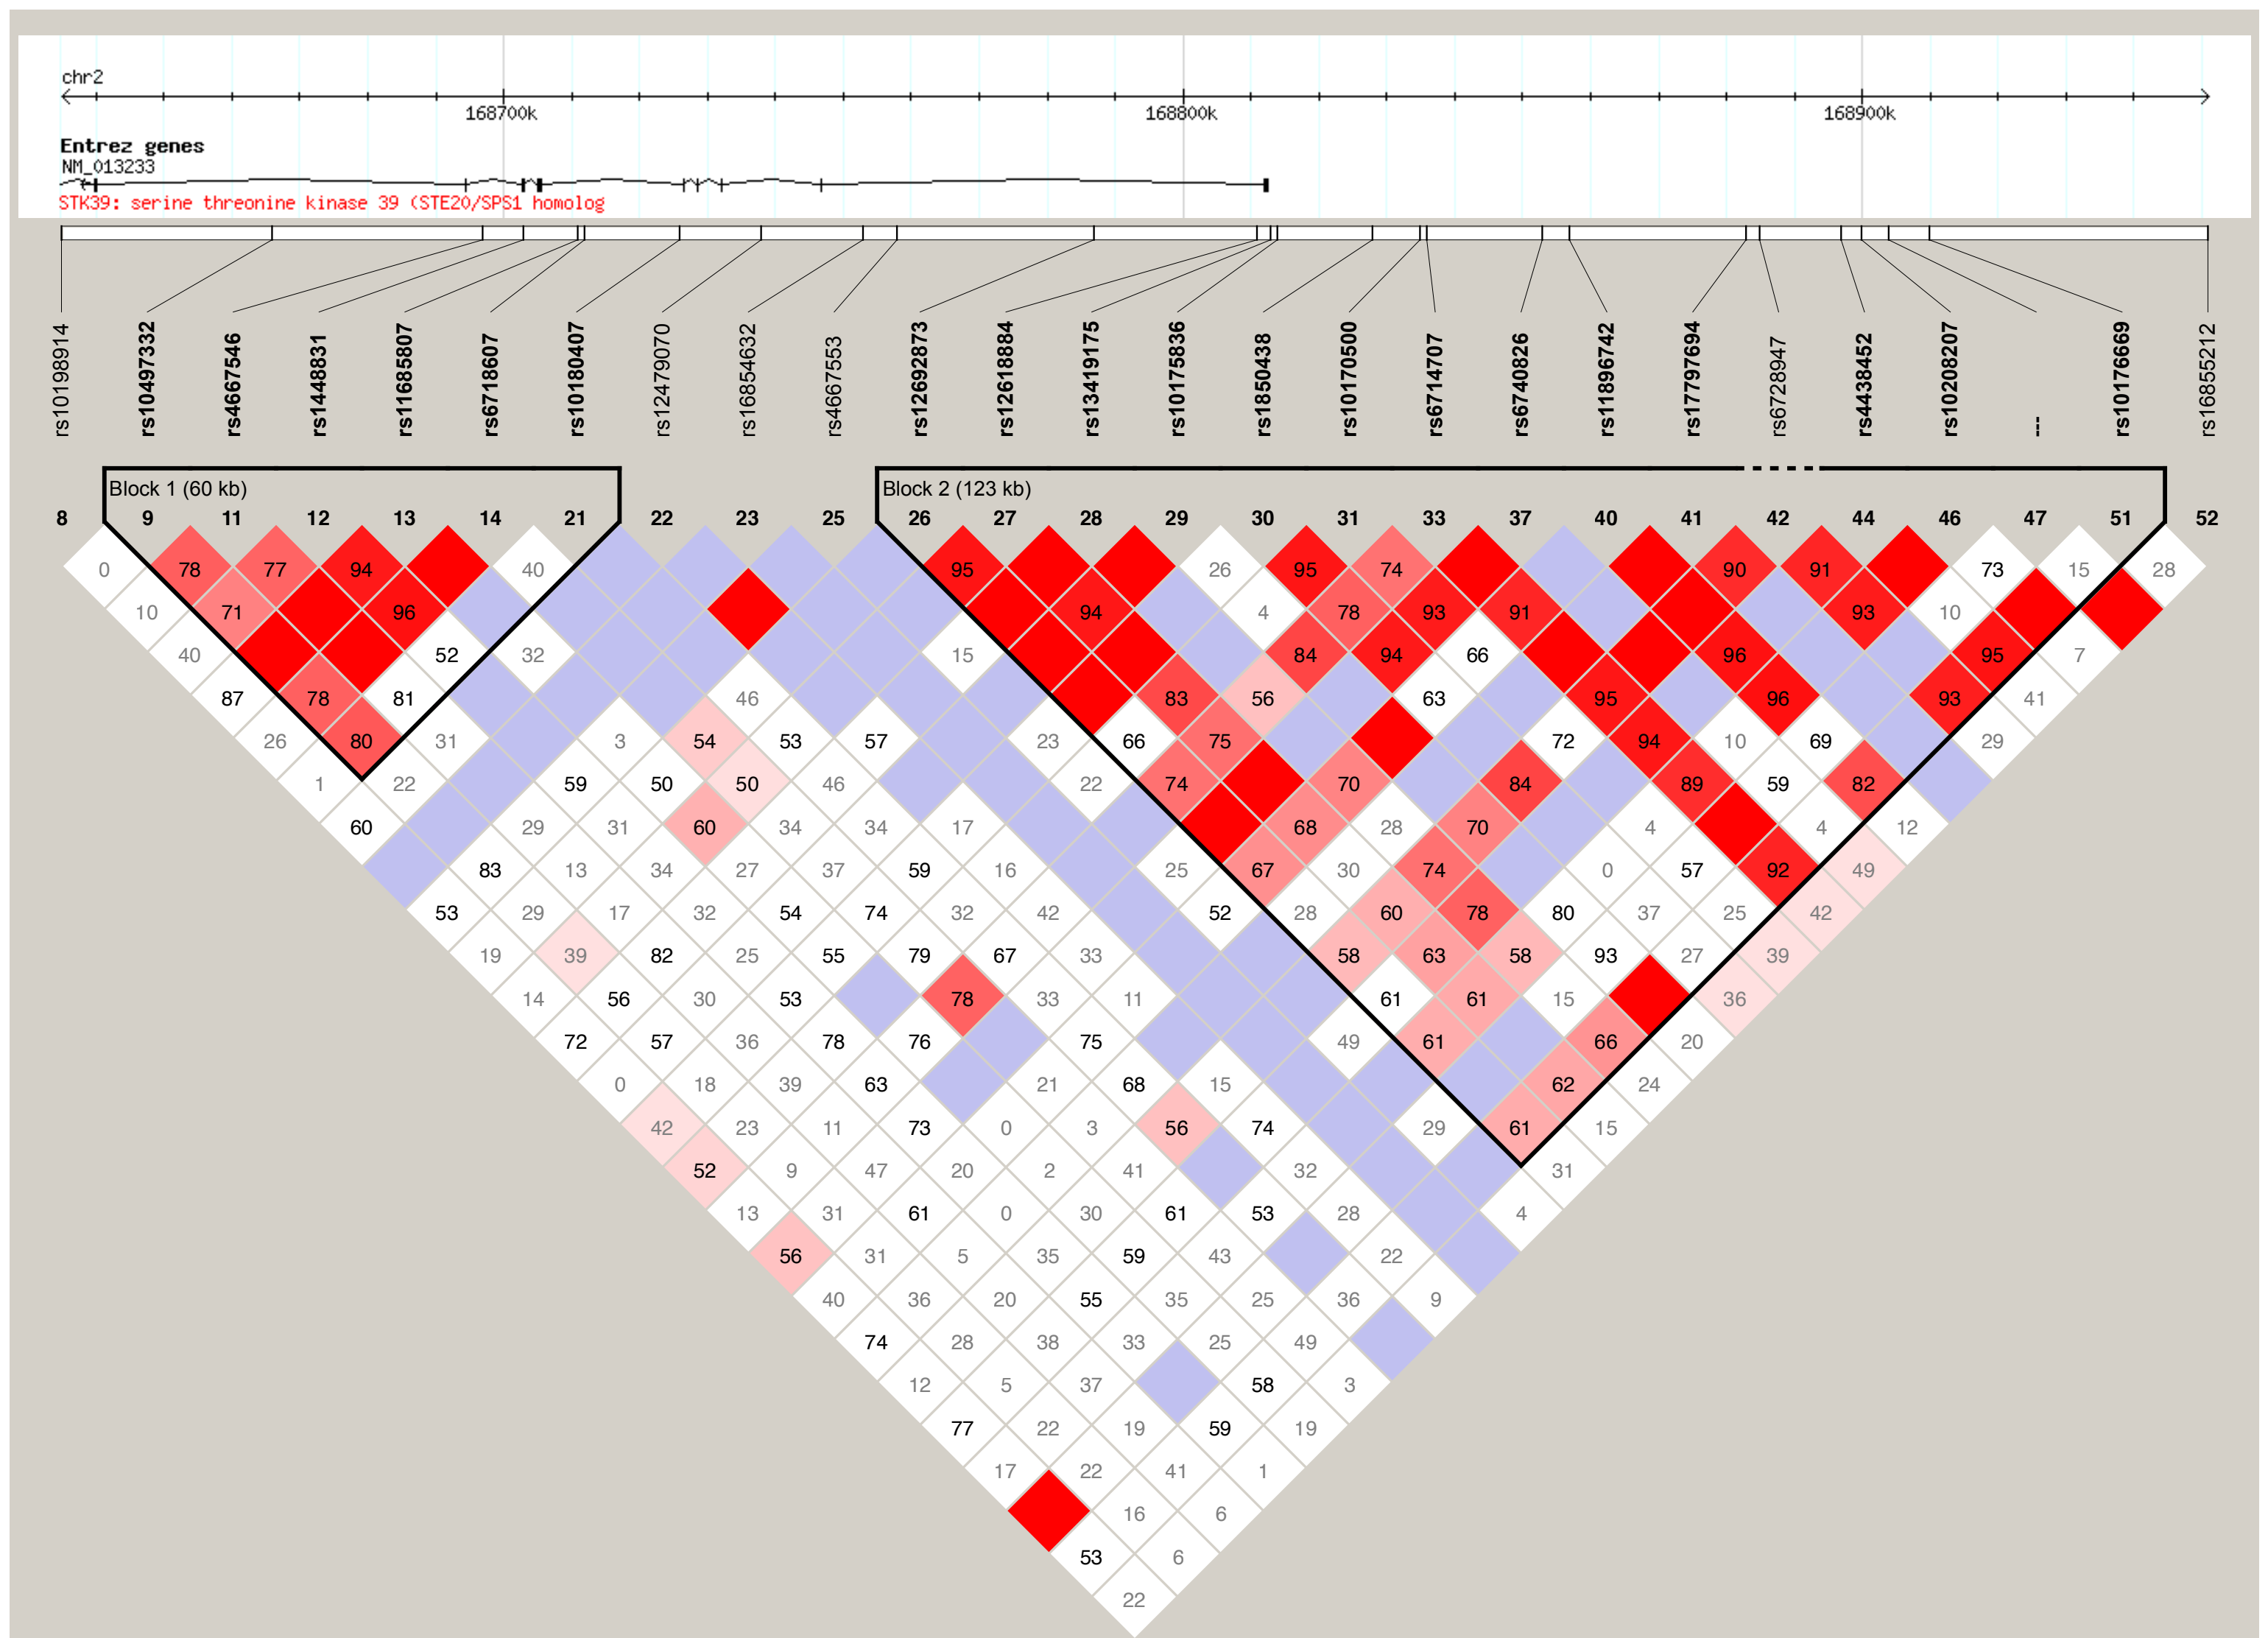

Supplement: JCO.2008.18.7906_1.pdf [file JCO.2008.18.7906_1.pdf]
