# Supplementary material
Source: PubMed Central journal article supplement (PMC2690391)

Figure 5. Panels A and B respectively represent the p values of the association of SNPs of the locus around rs12446308 (16p13.3) with the overall survival and the corresponding linkage disequilibrium (LD) structure. Panels C and D represent the p values and the LD plot around rs13041757 (20q13.1), and Panels E and F represent rs10517215 and rs1374653 (4p15). In panels A, C and E, the red points represent  $p < 0.01$  whereas blue points represent  $p \geq 0.01$ . In panels B, D and F, boxes are shaded according to the standardized disequilibrium coefficient and the numbers in the boxes represents the disequilibrium coefficient,  $D'$  where the empty boxes mean the  $D' = 1$ .

Panel 5A

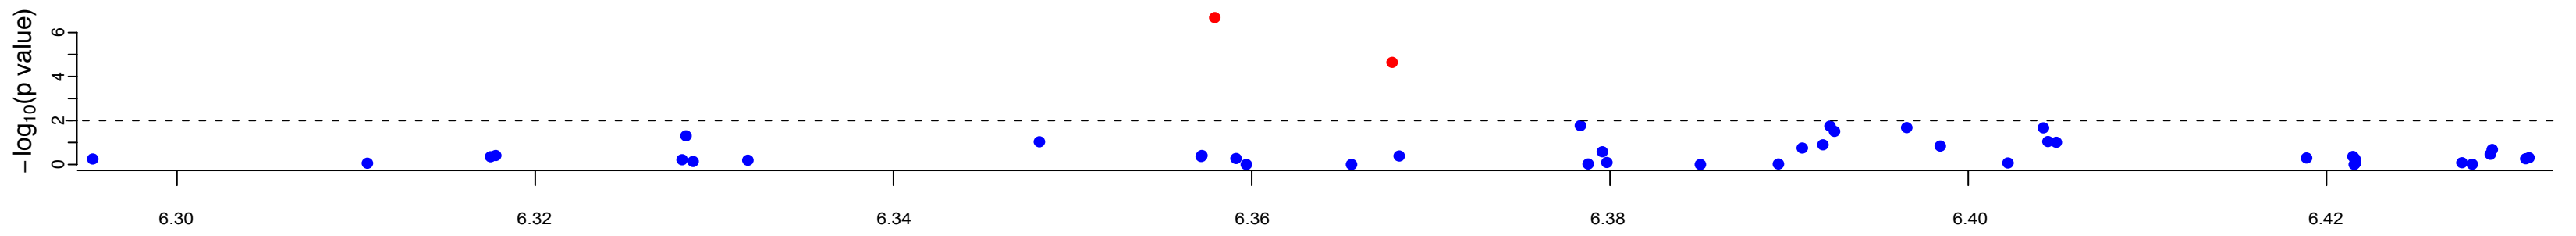

Panel 5B

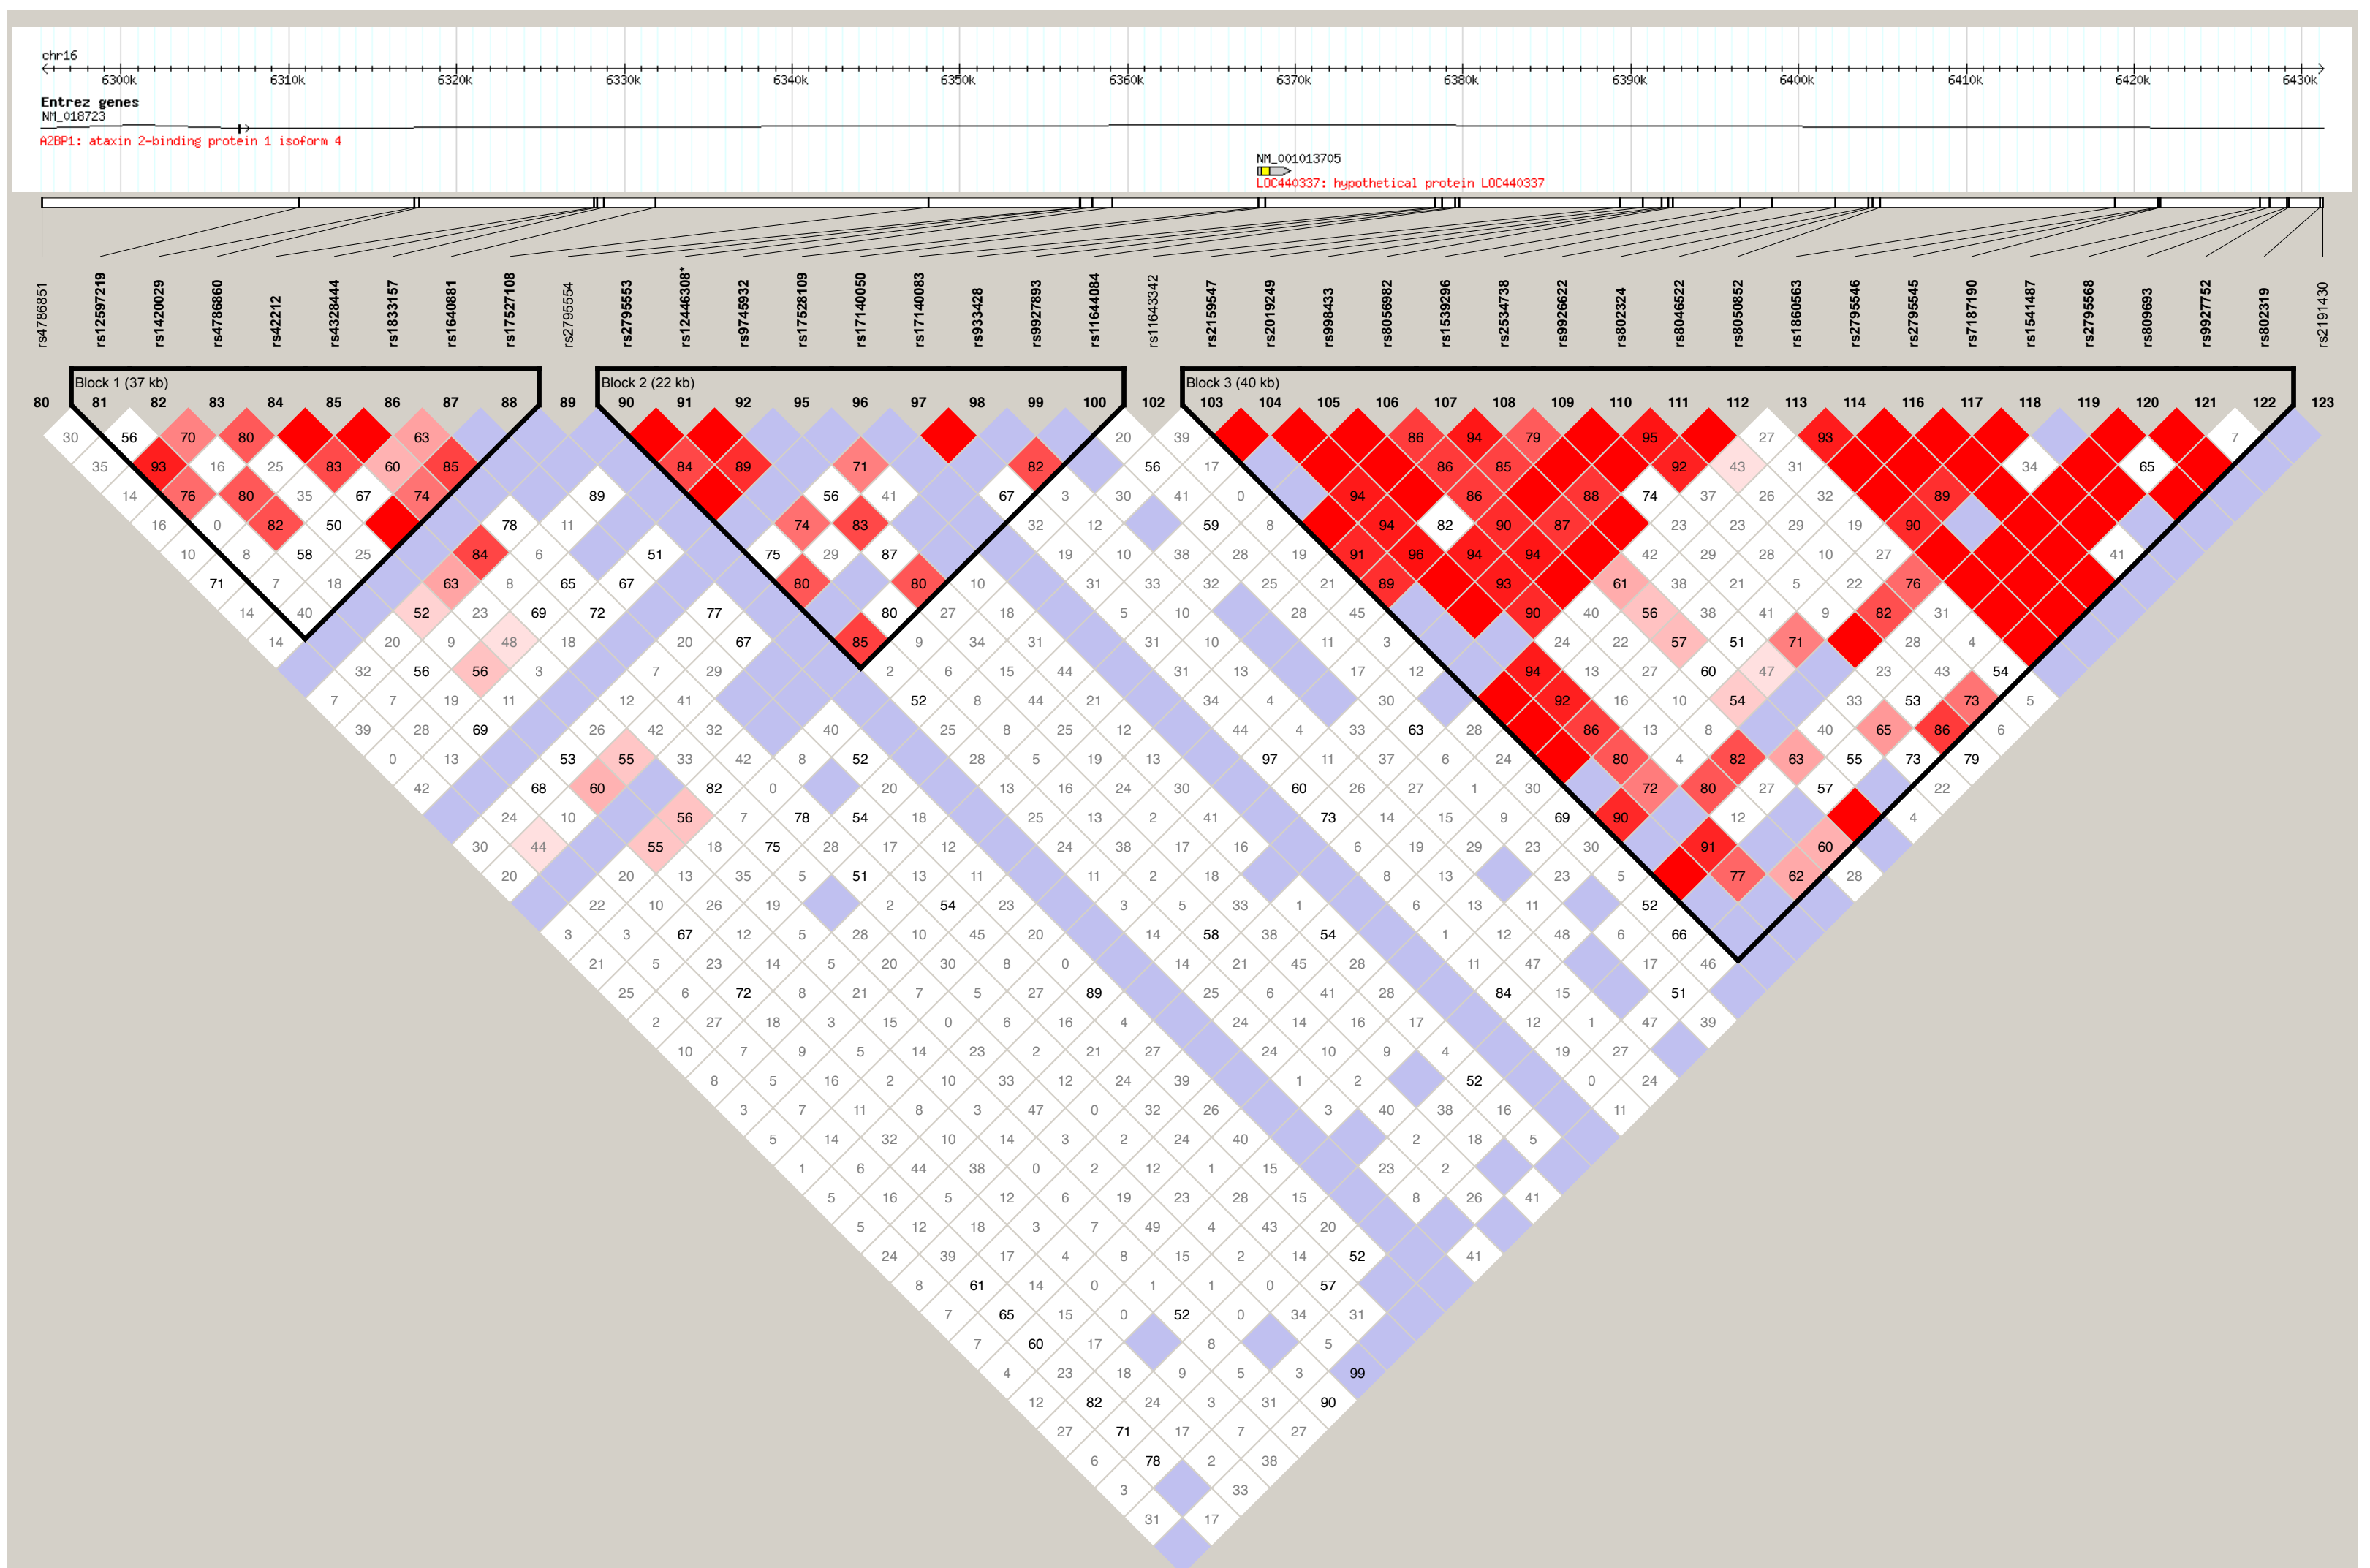

Panel 5C

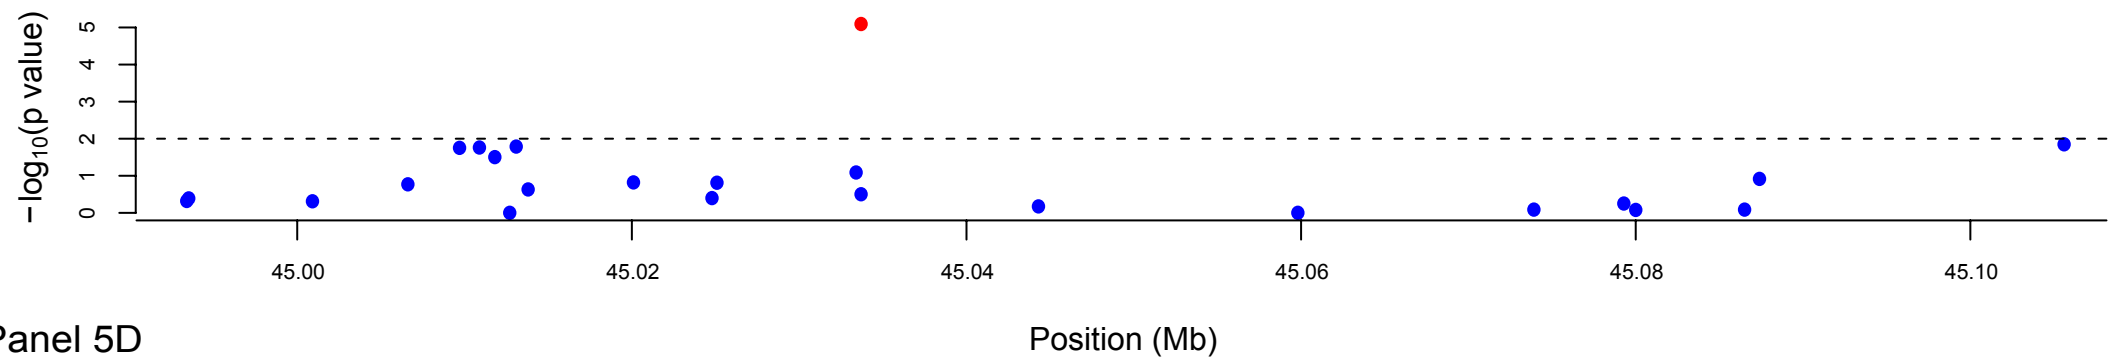

Panel 5D

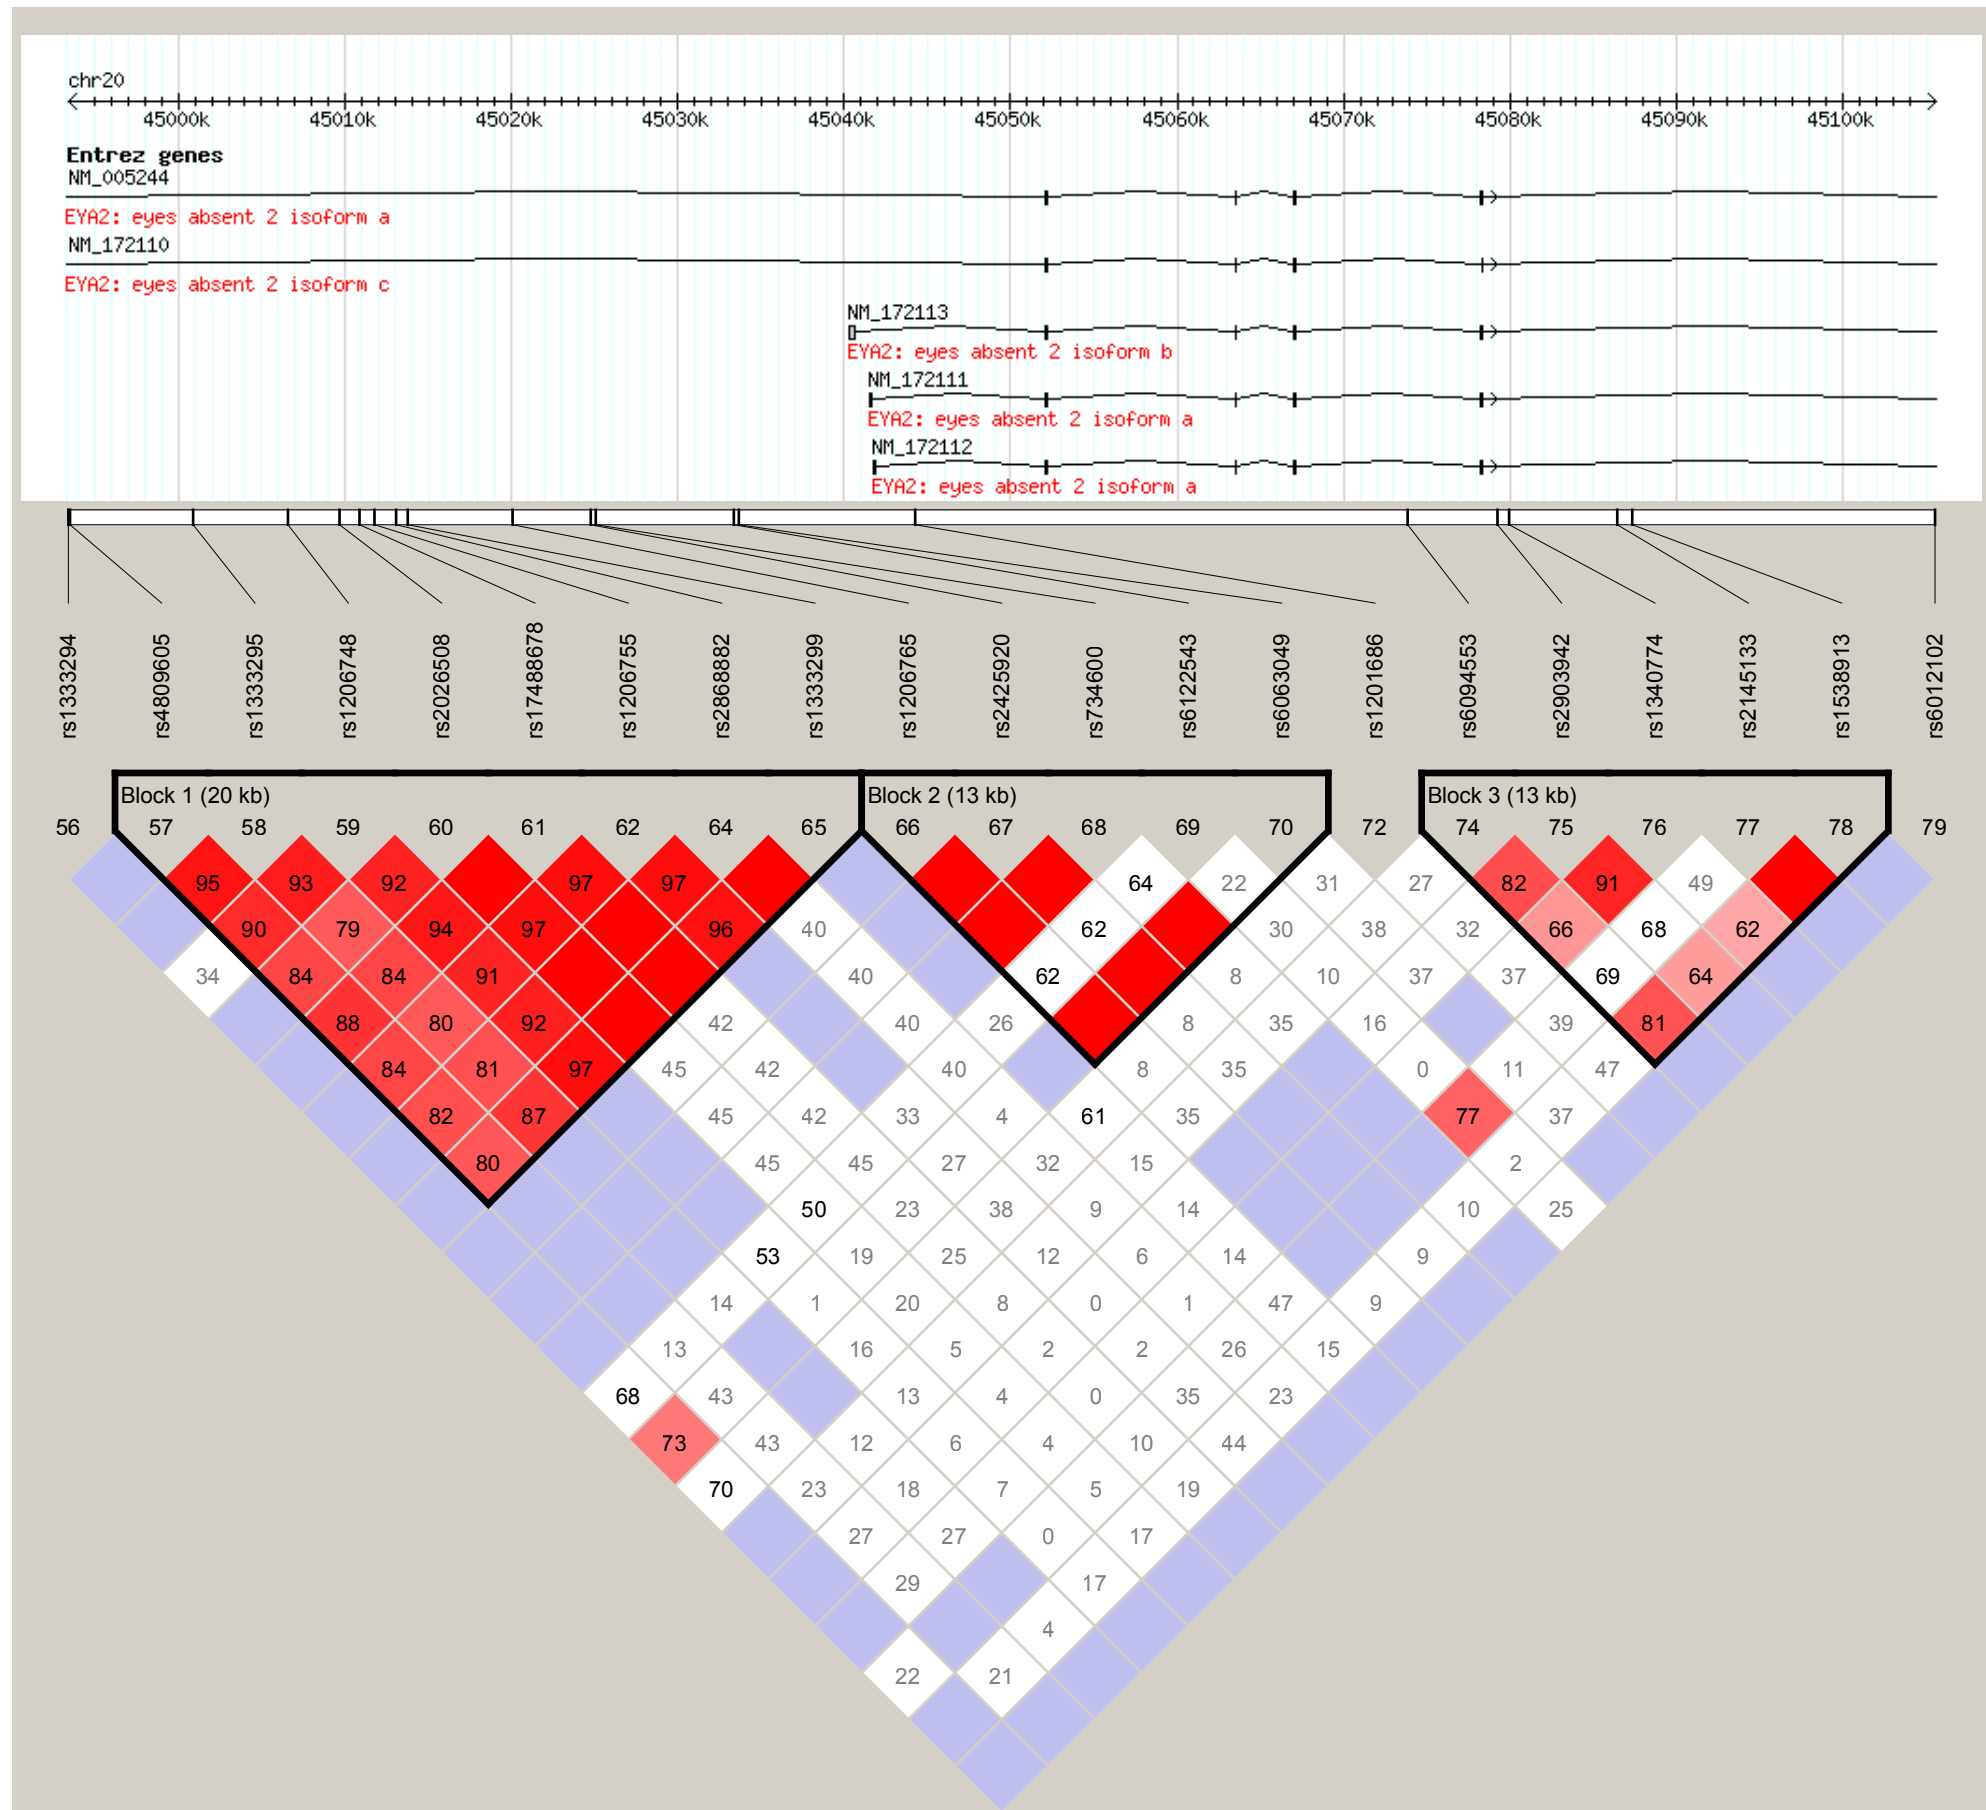

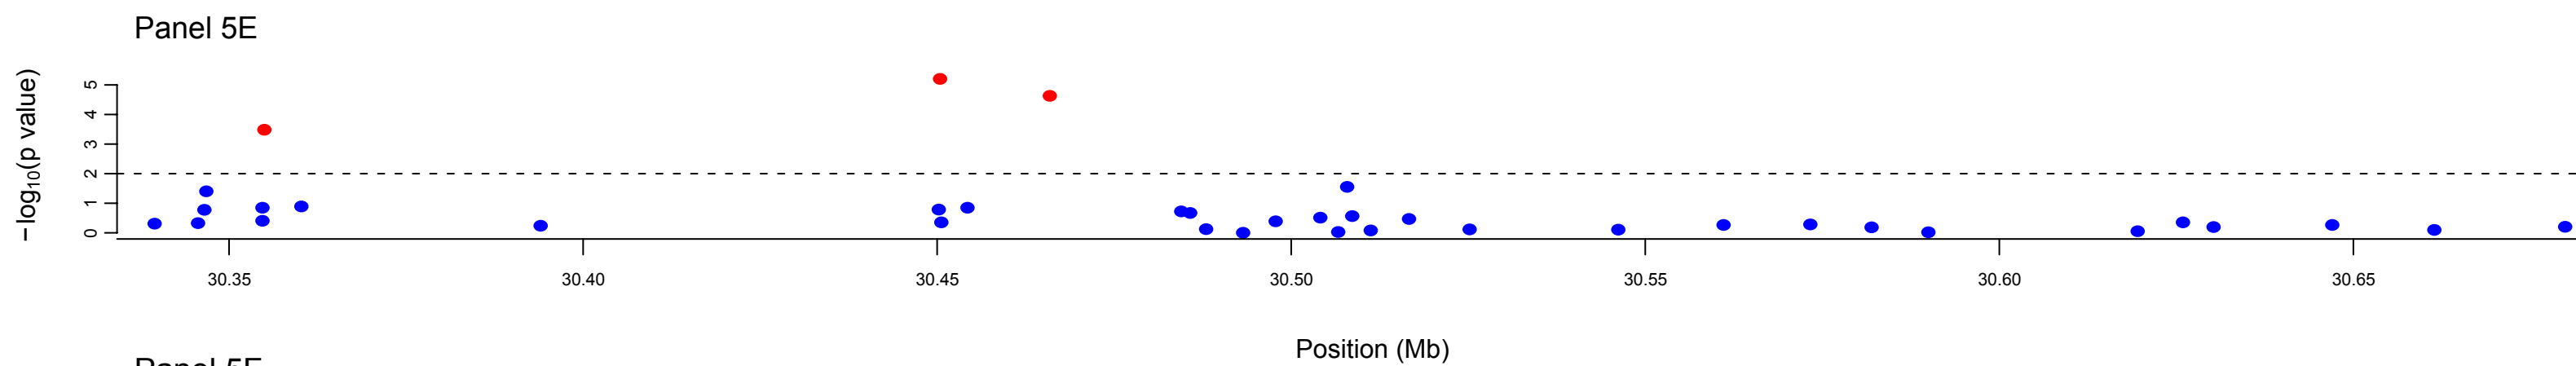

**Panel 5F**

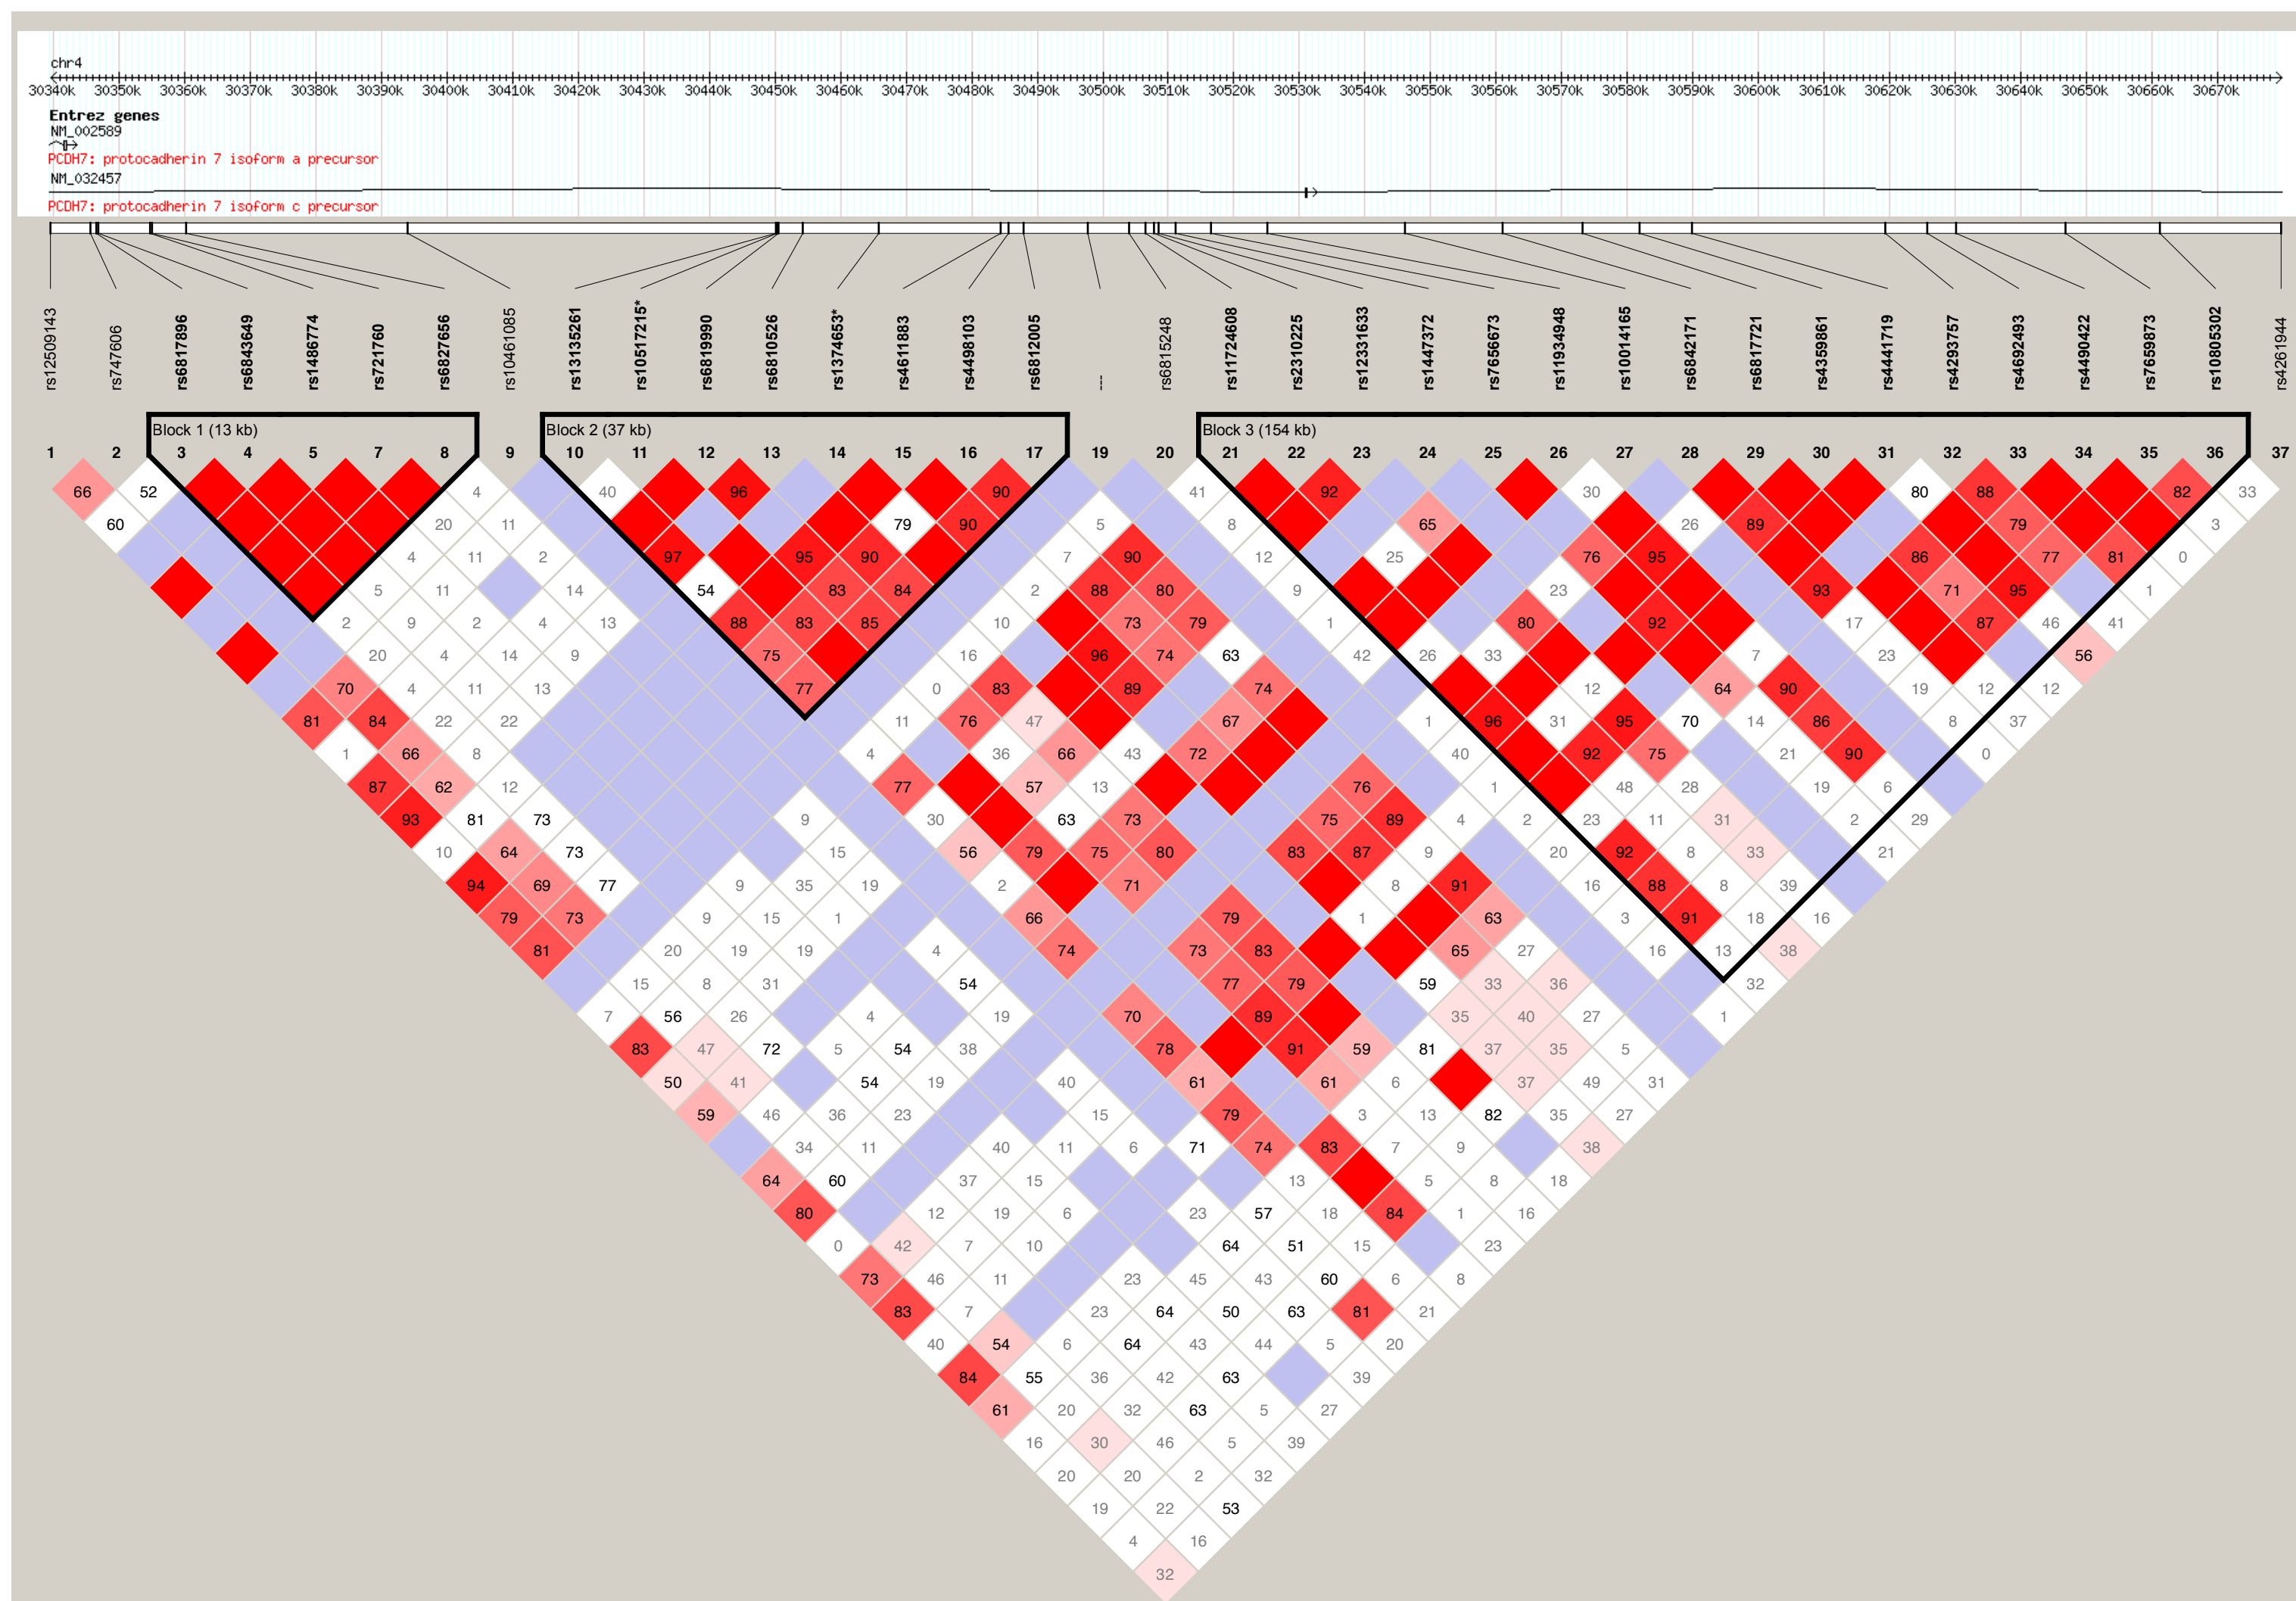

Supplement: JCO.2008.18.7906_2.pdf [file JCO.2008.18.7906_2.pdf]
